# Supplementary material
Source: PubMed Central journal article supplement (PMC2642748)

## **Supplemental Figure Legends**

### **Supplemental Figure S1. Mitochondrial fuels increase upon IL3 withdrawal in Bcl-2 and Bcl-xL expressing cells.**

(A) Control, (B) MyrAkt, (C) Bcl-xL or (D) Bcl-2 expressing cells were cultured in IL3 or withdrawn from IL3 for indicated times. Cell lysates were analyzed by tandem mass spectrometry to quantitate acyl-carnitines. Acyl-chain lengths and saturation (length:saturation) are indicated and means of triplicates and standard errors are shown. Asterisks denote  $p < 0.05$  by Student's t-Test of IL3 withdrawn samples compared to +IL3 samples. *Note different scales.* Data shown are representative of three or more experiments.

### **Supplemental Figure S2. Endogenous Bcl-2 and Bcl-xL levels are unaffected by autophagy suppression after growth factor withdrawal.**

Control FL5.12 cells were transfected with control, Atg5, or Atg12 shRNAi, and cultured in IL3 or withdrawn from IL3 for ten hours. Endogenous Bcl-2 and Bcl-xL were detected by immunoblot. Data shown are representative of three or more experiments.

### **Supplemental Figure S3. Doxycycline effectively suppresses Atg5 mRNA expression in Atg5 Tet-Off MEFs.**

Atg5 Tet-Off MEFs expressing Bcl-2 were treated with PBS or 5  $\mu\text{g}/\text{mL}$  doxycycline for four days, then Atg5 mRNA was determined by quantitative real-time PCR. Means and

standard deviations from triplicate samples are shown. Asterisks denote  $p < 0.05$  by Student's t-Test.

**Supplemental Figure S4. Autophagy shRNAi protects Bcl-xL expressing FL5.12 cells from IL3 withdrawal.**

Bcl-xL-expressing FL5.12 cells were transfected with control, Beclin-1, or Atg5 shRNAi, and viability was observed over time after IL3 withdrawal. Means and standard deviations from triplicate samples are shown. Asterisks denote  $p < 0.05$  by Student's t-Test for multiple time points for test samples relative to control samples. Data shown are representative of three or more experiments.

**Supplemental Figure S5. Autophagy shRNAi protects Ba/F3 cells from IL3 withdrawal.**

**A-D.** Ba/F3 (A) parental, (B) Bcl-2 expressing clone 6, (C) Bcl-xL expressing clone 4, or (D) Bcl-xL expressing clone 6 cells were transfected with control or Atg12 shRNAi and viability was observed over time after IL3 withdrawal. Means and standard deviations from triplicate samples are shown. Asterisks denote  $p < 0.05$  by Student's t-Test for test samples relative to control samples. Data shown are representative of three or more experiments.

**Supplemental Figure S6. Autophagy shRNAi protects 32D cells from IL3 withdrawal.**

**A, B.** 32D (**A**) parental, (**B**) polyclonal Bcl-2 expressing cells were transfected with control or Atg12 shRNAi and viability was observed after (**A**) 48 hours and (**B**) 72 hours. Means and standard deviations from triplicate samples are shown. Asterisks denote  $p < 0.05$  by Student's t-Test for test samples relative to control samples. Data shown are representative of three or more experiments.

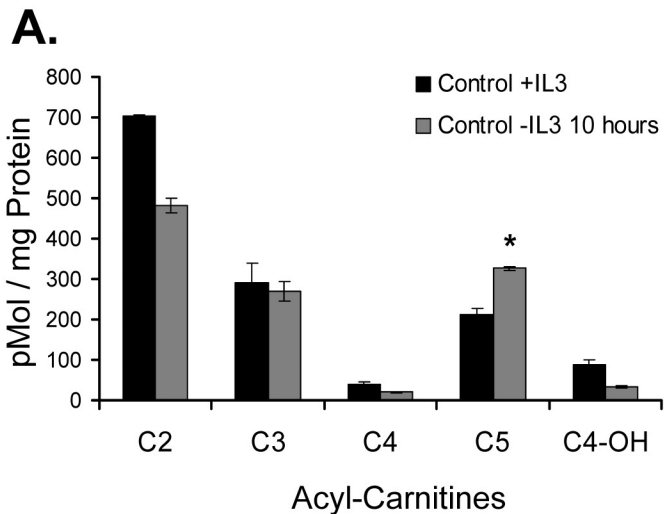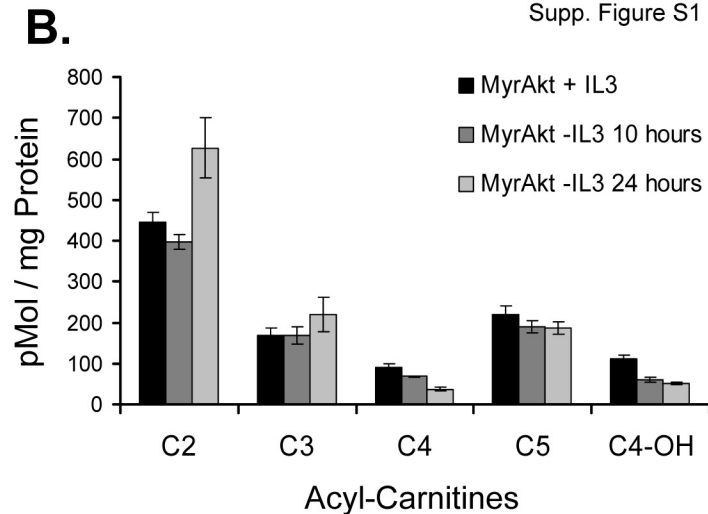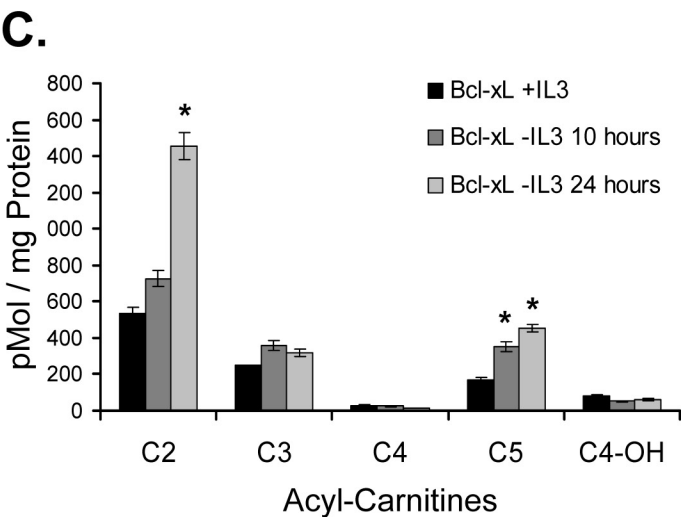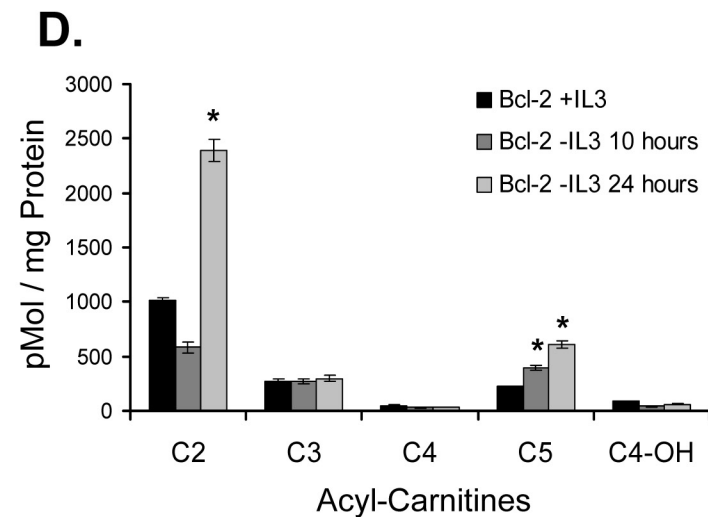

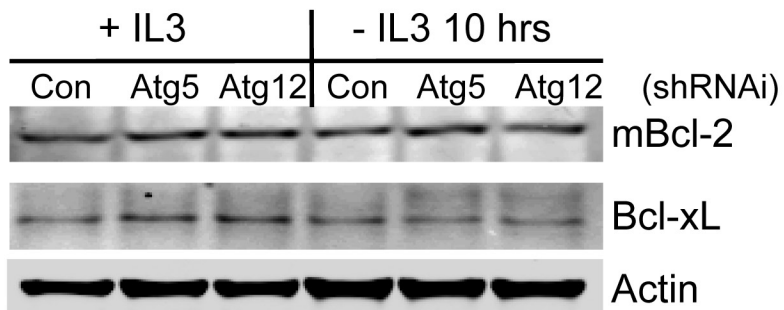

**Atg5 mRNA in Bcl-2 MEFs**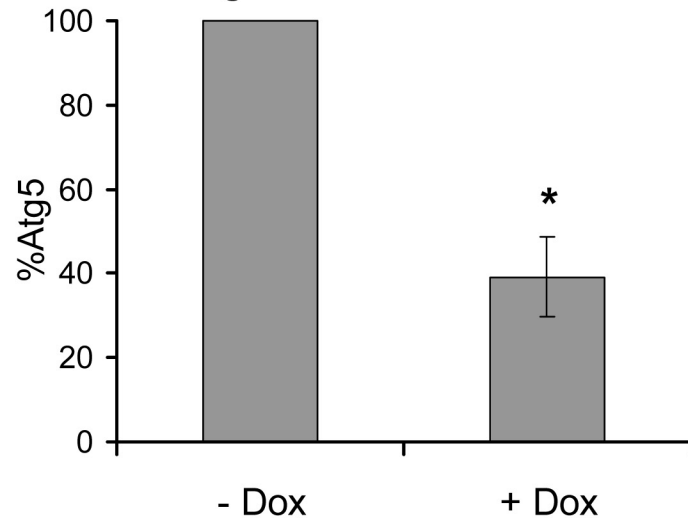

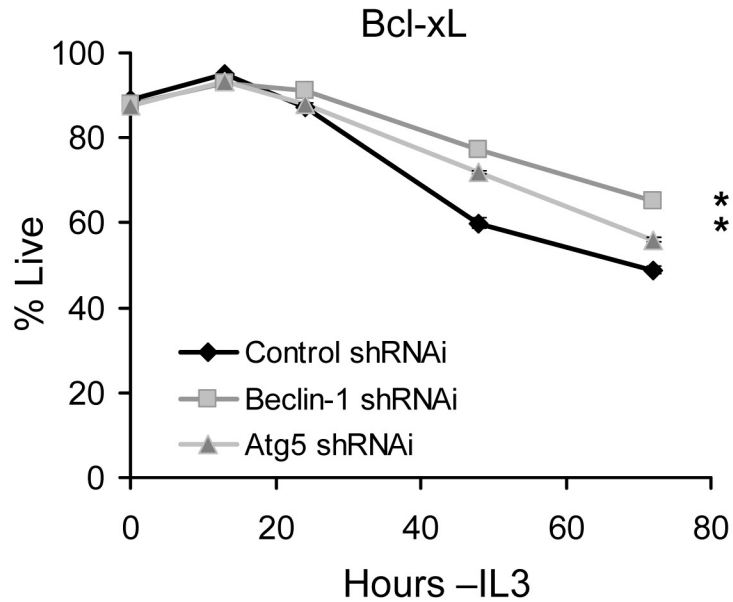

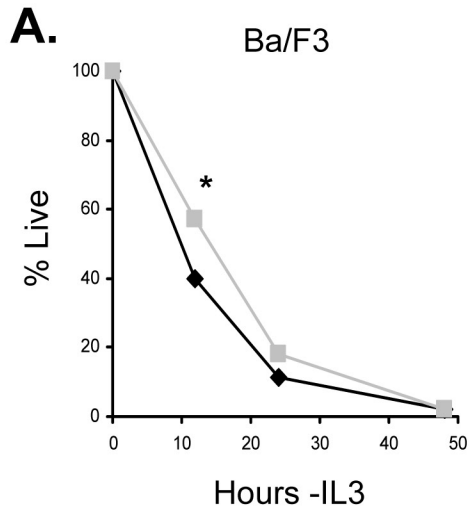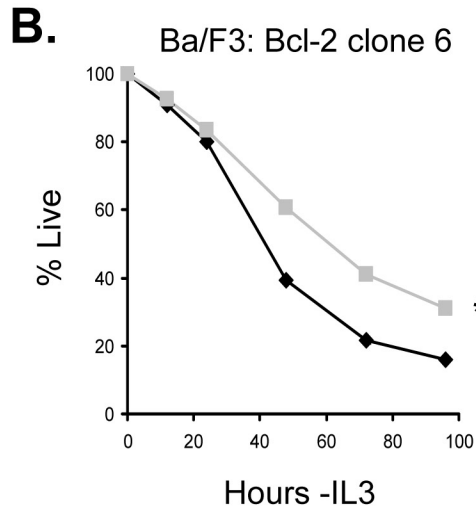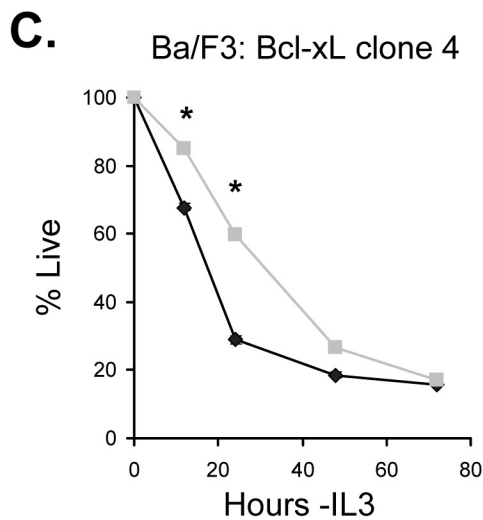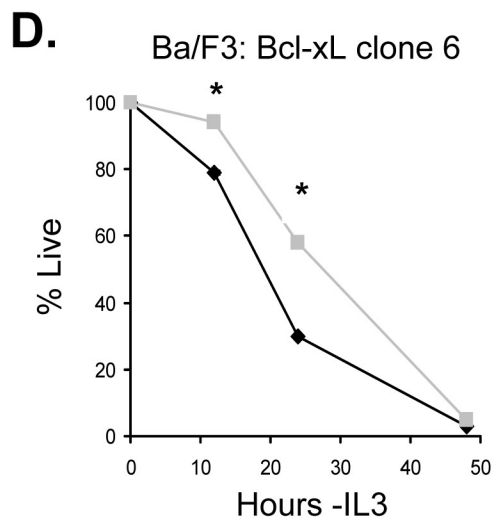

◆ Control shRNAi  
■ Atg12 shRNAi



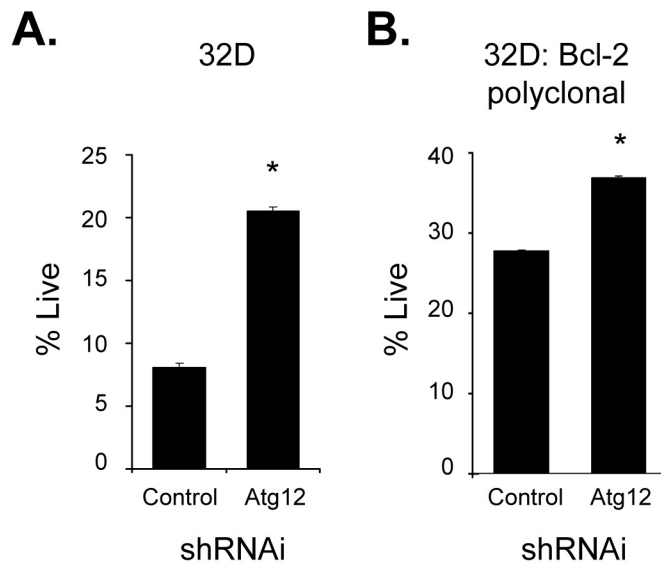

Supplement: E08-08-0829_1.pdf [file E08-08-0829_1.pdf]
